# Scientific Theories and Artificial Intelligence

Philippe Desjardins-Proulx<sup>0,1,2</sup>, Timothée Poisot<sup>2</sup>, and Dominique Gravel<sup>1</sup>

<sup>0</sup> email: [philippe.d.proulx@gmail.com](mailto:philippe.d.proulx@gmail.com)

<sup>1</sup> Université de Sherbrooke, Canada.

<sup>2</sup> Université de Montréal, Canada.

October 22, 2017

**Keywords:** *Artificial Intelligence, Theoretical Biology, Theoretical Ecology, Machine learning, Knowledge Representations.*

## 0 Summary

Artificial Intelligence presents an important paradigm shift for science. Science is traditionally founded on theories and models, most often formalized with mathematical formulas handcrafted by theoretical scientists and refined through experiments. Machine learning, an important branch of modern Artificial Intelligence, focuses on learning from data. This leads to a fundamentally different approach to model-building: we step back and focus on the design of algorithms capable of building models from data, but the models themselves are not designed by humans. This is even more true with deep learning, which requires little engineering by hand and is responsible for many of Artificial Intelligence's spectacular successes [30]. In contrast to logic systems, knowledge from a deep learning model is difficult to understand, reuse, and may involve up to a billion parameters [10]. On the other hand, probabilistic machine learning techniques such as deep learning offer an opportunity to tackle large complex problems that are out of the reach of traditional theory-making. It is possible that the more intuition-like [30] reasoning performed by deep learning systems is mostly incompatible with the logic formalism of mathematics. Yet recent studies have shown that deep learning can be useful to logic systems and vice versa. Success at unifying different paradigms of Artificial Intelligence from logic to probability theory offers unique opportunities to combine data-driven approaches with traditional theories. These advancements are susceptible to impact significantly biological sciences, where dimensionality is high and limit the investigation of traditional theories.

## 1 A.I. and knowledge representation

Science would greatly benefit from a unification of Artificial Intelligence with traditional mathematical theories. Modern research at the intersection of logic, probability theory, and fuzziness yielded rich representations increasingly capable of formalizing scientific knowledge. Such formal corpus could both include hand-crafted theories from Einstein's  $e = mc^2$  to the Breeder's equation [38], but also harness modern A.I. algorithms for testing and learning.

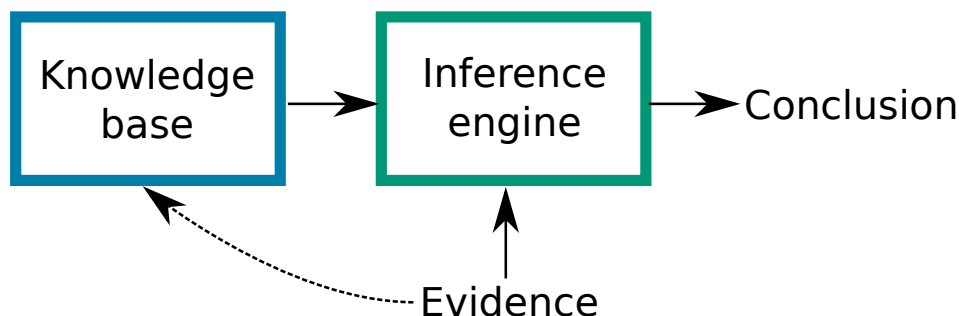

Figure 1: In his 1959’s “Programs with Common Sense”, McCarthy established the importance of separating knowledge and reasoning [34]. The knowledge base stores knowledge, while the inference engine exploits it, along with evidence, to reach conclusions. McCarthy believed the knowledge base should store rules in some form of predicate logic, but the idea of separation of knowledge and reasoning holds with other representations as well (Bayesian networks, detailed in figure 2, are probabilistic knowledge bases [11]). The dotted line represents automatic theory revision, where evidence is used not to answer a query but to discover new knowledge or revise existing theories.

35 Comprehensive synthesis is difficult in fields like biology, which have not been reduced to  
36 a small set of formulas. For example, while we have a good idea of the underlying forces  
37 driving evolution, we struggle to build effective predictive models of molecular evolution  
38 [18]. This is likely because selection changes in time and space [4], which brings population,  
39 community, and ecosystem ecology into the mix. Ecology also has a porous frontier with  
40 evolution: speciation is a common theme in community ecology theory [12].

41 From a theoretical perspective, work to formalize scientific theories would reveal much  
42 about the nature of our theories. Surely, scientific theories require more flexibility than  
43 mathematical corpora of knowledge, which are based on pure logic. From a practical stand-  
44 point, a formal representation both offers ways to test large corpora of knowledge and extend  
45 it with A.I. techniques. This is arguably the killer feature of a formal representation of sci-  
46 entific knowledge: allowing A.I. algorithms to search for revisions, extensions, and discover  
47 new rules. This is not a new ambition. Generic techniques for rule discovery were well-  
48 established in the 1990s [37]. Unfortunately, these techniques were based on pure logic, and  
49 purely probabilistic approaches to revision cannot handle mathematical theories. Recent  
50 experiences in linguistics has shown that building a knowledge base capable of handling  
51 several problems at the same time yielded better results than attacking the problem in iso-  
52 lation because of the problems’ interconnectedness [45]. Biology, as a complex field made  
53 of more-or-less arbitrary subfields, could gain important insights from unified approach to  
54 knowledge combining A.I. techniques with traditional mathematical theories.

## 55 2 A quick tour of knowledge representations

56 Deep learning is arguably the dominant approach in probabilistic machine learning, a branch  
57 of A.I. focused on learning models from data [17]. The idea of deep learning is to learn  
58 multiple levels of compositions. If we want to learn to classify images for instance, the first

59 layer of the deep learning network will read the input, the next layer will capture lines, the  
60 next layer will capture contours based on lines, and then more complex shapes based on  
61 contours, and so on [17]. In short, the layers of the network begin with simple concepts,  
62 and then compose more complicated concepts from simpler ones [5]. Deep learning has been  
63 used to solve complex computer science problems like playing Go at the expert level [41], but  
64 it is also used for more traditional scientific problems like finding good candidate molecules  
65 for drugs, predicting how changes in the genotype affect the phenotype [31], or just recently  
66 to solving the quantum many-body problem [9].

67 In contrast, traditional scientific theories and models are mathematical, or logic-based.  
68 Einstein's  $e = mc^2$  established a logical relationship between energy  $e$ , mass  $m$ , and the speed  
69 of light  $c$ . This mathematical knowledge can be reused: in any equation with energy, we could  
70 replace  $e$  with  $mc^2$ . This ability of mathematical theories to establish precise relationships  
71 between concepts, which can then be used as foundations for other theories, is fundamental  
72 to how science grows and forms an interconnected corpus of knowledge. Furthermore, these  
73 theories are compact and follow science's tradition of preferring theories as simple as possible.  
74 There are many different foundations for logic systems. Predicate logic is a good starting  
75 point: it is based on predicates, which are functions of terms to a truth value. For example,  
76 the predicate *PreyOn* could take two species, a location, and return true if the first species  
77 preys on the second at that location, like *PreyOn(Wolverine, Squirrel, Quebec)*. Terms  
78 are either *constants* such as 1,  $\pi$ , or *Wolverine*, *variables* that range over constants, such  
79 as  $x$  or *species*, or *functions* that map terms to terms, such as additions, multiplication,  
80 integration, differentiation. In  $e = mc^2$ , the equal sign  $=$  is the predicate,  $e$  and  $m$  are  
81 variables,  $c$  and 2 are constants, and there are two functions: the multiplication of  $m$  by  $c^2$   
82 and the the exponentiation of  $c$  by 2. The key point is that such formalism lets us describe  
83 compact theories and understand precisely how different concepts are related. Complex  
84 logic formulas are built by combining predicates with connectives such as negation  $\neg$ , "and"  
85  $\wedge$ , "or"  $\vee$ , "implication"  $\Rightarrow$ . We could have a rule to say that predation is asymmetrical  
86  $s_x \neq s_y \wedge \text{PreyOn}(s_x, s_y, l) \Rightarrow \neg \text{PreyOn}(s_y, s_x, l)$ , or define the classical Lotka-Volterra:

$$\frac{dx}{dt} = \alpha x - \beta xy \wedge \frac{dy}{dt} = \delta xy - \gamma y, \quad (1)$$

87 where  $x$  and  $y$  are the population sizes of the prey and the predator, respectively,  $\alpha$ ,  
88  $\beta$ ,  $\delta$ ,  $\gamma$  are constants, and the time differential  $d/dt$ , multiplication and subtraction are  
89 functions. Equality ( $=$ ) is the sole predicate in this formula. Both predicates are connected  
90 via  $\wedge$  ("and"). Not all logic formulas have mathematical functions. Simple logic rules such  
91 as *Smoking(p)  $\Rightarrow$  Cancer(p)* ("smoking causes cancer") are common in expert systems.

92 Artificial Intelligence researchers have long being interested in logic systems capable  
93 of scientific discoveries, or simply capable of storing scientific and medical knowledge in  
94 a single coherent system (Figure 1). DENDRAL, arguably the first expert system, could  
95 form hypotheses to help identify new molecules using its knowledge of chemistry [32]. In  
96 the 1980s, MYCIN was used to diagnose blood infections (and did so more accurately than  
97 professionals) [8]. Both systems were based on logic, with MYCIN adding a "confidence  
98 factor" to its rules to model uncertainty. Other expert systems were based on probabilistic  
99 graphical models [27], a field that unites graph theory with probability theory to model the  
100 conditional dependence structure of random variables [27, 2]. For example, Mumin had a  
101 network of more than 1000 nodes to analyze electromyographic data [14], while PathFinder  
102 assisted medical professional for the diagnostic of lymph-node pathologies [22] (Figure 2).  
103 While these systems performed well, they are both too simple to store generic scientific

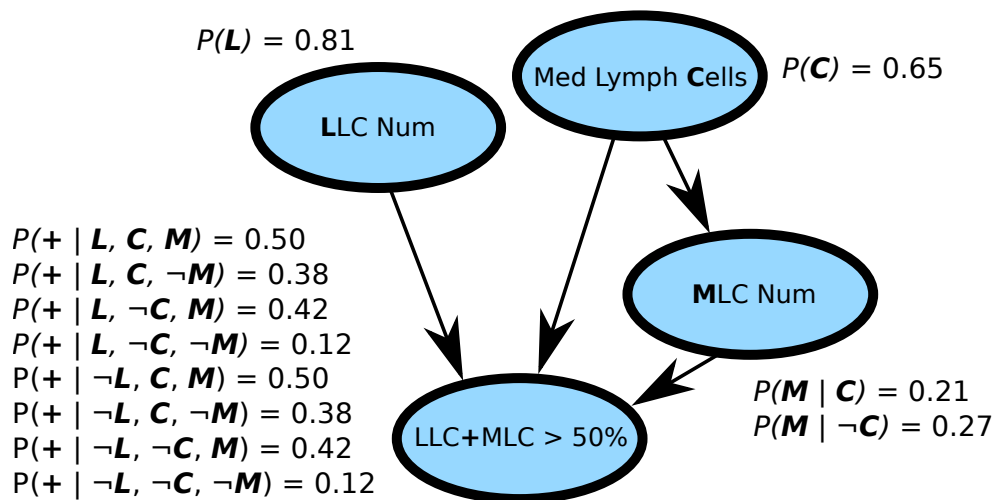

Figure 2: A Bayesian network with four binary variables and possible conditional probability tables. These four nodes were taken from PathFinder, a Bayesian network with more than 1000 nodes used to help diagnose blood infections [22]. The nodes represent four variables related to blood cells and are denoted by a single character (in bold in the figure):  $C, M, L, +$ . All variables are binary, and negation is denoted with  $\neg$ . Since  $P(\neg x | \mathbf{y}) = 1 - P(x | \mathbf{y})$ , we need only  $2^{|Pa(x)|}$  parameters per nodes, with  $|Pa(x)|$  being the number of parents of node  $x$ . The structure of Bayesian networks both highlights the conditional independence assumptions of the distribution and reduces the number of parameters for learning and inference. Example query:  $P(L, \neg C, M, \neg +) = P(L)P(\neg C)P(M|\neg C)P(\neg + | L, \neg C, M) = 0.81 \times (1 - 0.65) \times 0.27 \times (1 - 0.42) = 0.044$ . See [11] for a detailed treatment of Bayesian networks and [27] for a more general reference on probabilistic graphical models.

104 knowledge and too static to truly unify Artificial Intelligence with scientific research. The  
 105 ultimate goal is to have a representation rich enough to encode both logic-mathematical and  
 106 probabilistic scientific knowledge.

### 107 3 Beyond monolithic systems

108 In terms of representation, expert systems generally used a simple logic system, not powerful  
 109 enough to handle uncertainty, or purely probabilistic approaches unable to handle complex  
 110 mathematical formulas. In terms of flexibility, the expert systems were hand-crafted by  
 111 human experts. After the experts established either the logic formulas (for logic systems  
 112 like DENDRAL) or probabilistic links (in the case of systems like Munin), the expert systems  
 113 act as static knowledge bases, capable of answering queries but unable of discovering new  
 114 rules and relationships. While no system has completely solved these problems yet, much  
 115 energy has been put in unifying logic-based systems with probabilistic approaches [16]. Also,  
 116 several algorithms have been developed to learn new logic rules [37], find the probabilistic  
 117 structure in a domain with several variables [46], and even transfer knowledge between tasks  
 118 [36]. Together, these discoveries bring us closer to the possibility of flexible knowledge bases  
 119 contributed both by human experts and Artificial Intelligence algorithms. This has been

120 made possible in great part by efforts to unify three distinct languages: probability theory,  
121 predicate logic, and fuzzy logic (Fig 3).

122 The core idea behind unified logic/probabilistic languages is that formulas can be weigh-  
123 ted, with higher values meaning we have greater certainty in the formula. In pure logic, it is  
124 impossible to violate a single formula. With weighted formulas, an assignment of concrete  
125 values to variables is only *less likely* if it violates formulas. The higher the weight of the  
126 formula violated, the less likely the assignment is. It is conjectured that all perfect numbers  
127 are even ( $\forall x : Perfect(x) \Rightarrow Even(x)$ ), if we were to find a single odd perfect number,  
128 that formula would be refuted. It makes sense for mathematics but for many disciplines,  
129 such as biology, important principles are only expected to be true *most* of the times. To  
130 illustrate, in ecology, predators generally have a larger body weight than their preys, which  
131 can expressed in predicate logic as  $PreyOn(predator, prey) \Rightarrow M(predator) > M(pre)$ ,  
132 with  $M(x)$  being the body mass of  $x$ . This is obviously false for some assignments, for  
133 example  $predator : greywolf$  and  $prey : moose$ . However, it is useful knowledge that  
134 underpins many ecological theories [44]. When our domain involves a great number of  
135 variables, we should expect useful rules and formulas that are not always true.

136 The idea of weighted formulas is not new. Markov logic, invented a decade ago, allows  
137 for logic formulas to be weighted [39, 13]. It supports algorithms to add weights to existing  
138 formulas given a data-set, learn new formulas or revise existing ones, and answer probabilistic  
139 queries. For example, Yoshikawa et al. used Markov logic to understand how events in a  
140 document were time-related [45]. Their research is a good case study of interaction between  
141 traditional theory-making and artificial intelligence. The formulas they used as a starting  
142 point were well-established logic rules to understand temporal expressions. From there,  
143 they used Markov logic to weight the rules, adding enough flexibility to their system to beat  
144 the best approach of the time. Brouard et al. [7] used Markov logic to understand gene  
145 regulatory network, noting how the resulting model provided clear insights, in contrast to  
146 more traditional machine learning techniques. Expert systems can afford to make important  
147 sacrifices to flexibility in exchange for a simple representation. Yet, a system capable of  
148 representing a large body of scientific knowledge will require a great deal of flexibility to  
149 accommodate various theories. While a step in the right direction, even Markov logic may  
150 not be powerful enough.

## 151 4 Case study: The niche model

152 To show some of the difficulties of representing scientific knowledge, we will build a small  
153 knowledge base for an established ecological theory: the niche model of trophic interactions  
154 [44]. The first iteration of the niche model posits that all species are described by a niche  
155 position  $N$  (their body size for instance) in the  $[0, 1]$  interval, a diet  $D$  in the  $[0, N]$  interval,  
156 and a range  $R$  such that a species preys on all species with a niche in the  $[D - R/2, D + R/2]$   
157 interval. We can represent these ideas with three formulas:

$$158 \quad \forall x, y : \neg PreyOn(x, y), \quad (2a)$$

$$159 \quad \forall x : D(x) < N(x), \quad (2b)$$

$$160 \quad \forall x, y : PreyOn(x, y) \Leftrightarrow D(x) - R(x)/2 < N(y) \wedge N(y) < D(x) + R(x)/2, \quad (2c)$$

161 where  $\forall$  reads *for all* and  $\Leftrightarrow$  is logical equivalence (it is true if and only if both sides  
of the operator have the same truth value, so for example  $False \Leftrightarrow False$  is true and

162 *True*  $\Leftrightarrow$  *False* is false). As pure logic, this knowledge base makes little sense. Formula  
 163 2a is obviously not true all the time. It is mostly true, since most pairs of species do  
 164 not interact. We could also add that cannibalism is rare  $\forall x : \neg \text{PreyOn}(x, y)$  and that  
 165 predator-prey are generally asymmetrical  $\forall x, y : \text{PreyOn}(x, y) \Rightarrow \neg \text{PreyOn}(y, x)$ . In hybrid  
 166 probabilistic/logic approaches like Markov logic, these formulas would have a weight that  
 167 essentially defines a marginal probability [13, 25]. Formulas that are often wrong are assigned  
 168 a lower weight but can still provide useful information about the system. The second formula  
 169 says that the diet is smaller than the niche value. The last formula is the niche model: species  
 170  $x$  preys on  $y$  if and only if species  $y$ 's niche is within the diet interval of  $x$ .

171 So far so good! Using Markov logic networks and a data-set, we could learn a weight  
 172 for each formula in the knowledge base. This step alone is useful and provide insights into  
 173 which formulas hold best. With the resulting weighted knowledge base, we could make  
 174 probabilistic queries and even attempt to revise the theory automatically. We could find,  
 175 for example, that the second rule does not apply to parasites or some group and get a revised  
 176 rule such as  $\forall x : \neg \text{Parasite}(x) \Rightarrow D(x) < N(x)$ . However, Markov logic networks struggle  
 177 when the predicates cannot easily return a simple true-or-false truth values. For example,  
 178 let's say we wanted to express the idea that when populations are small and have plenty of  
 179 resources, they grow exponentially [29].

$$\forall x, l, t : \text{SmallP}(x, l, t) \text{ and } \text{Resources}(x, l, t) \Rightarrow P(x, l, t + 1) = G(x) \times P(x, l, t), \quad (3)$$

180 where  $P(x, l, t)$  is the population size of species  $x$  in location  $l$  at time  $t$ ,  $G$  is the rate of  
 181 growth, *SmallP* is whether the species has a small population and *Resources* whether it has  
 182 resources available. The problem with hybrid probabilistic/logic approach is that predicates  
 183 do not capture the inherent vagueness well. We can establish an arbitrary cutoff for what a  
 184 small population is, for example by saying that if it is less than 10% the average population  
 185 size for the species, it is small. Similarly, resource availability is not a binary thing, there  
 186 is a world of grey between starvation and satiety. Perhaps worst of all, the prediction that  
 187  $P(x, l, t + 1) = G(x) \times P(x, l, t)$  is almost certainly never be exactly true. If we predict 94  
 188 rabbits and observe 93, the formula is false. Weighted formulas help us understand *how*  
 189 *often a rule is true*, but in the end the formula has to give a binary truth value: true or  
 190 false, there is no place for vagueness.

191 Fuzzy sets and many-valued (“fuzzy”) logics were invented to handle vagueness [47, 24,  
 192 6, 3]. In practice, it simply means that predicates can return any value in the  $[0, 1]$  closed  
 193 interval instead of only true and false. It is used in both probabilistic soft logic [26, 1]  
 194 and deep learning approaches to predicate logic [48, 23]. For our formula 3, *SmallP* could  
 195 be defined as  $1 - P(x, l, t)/P_{max}(x)$ , where  $P_{max}(x)$  is the largest observed population size  
 196 for the species. *Resources* could take into account how many preys are available, and  
 197  $P(x, l, t + 1) = G(x) \times P(x, l, t)$  would return a truth value based on how close the observed  
 198 population size is the predicted population size. Fuzzy logic then defines how operators such  
 199 as *and* and  $\Rightarrow$  behave with fuzzy values.

200 Both Markov logic networks and probabilistic soft logic define a probability distribution  
 201 over logic formulas, but what about the large number of probabilistic models? For example,  
 202 the niche model has a probabilistic counter-part defined as [43]:

$$\forall x, y : \text{PPreyOn}(x, y) = \alpha \times \exp \left[ - \left( \frac{N(y) - D(x)}{R(x)/2} \right)^2 \right], \quad (4)$$

203 where  $PPreyOn(x, y)$  is the probability that  $x$  preys on  $y$ . Again, this formula is prob-  
204 lematic in Markov logic because we cannot easily force the equality into a binary true-or-false,  
205 but fuzziness can help model the nuance of probabilistic predictions.

## 206 5 Where's our unreasonably effective paradigm?

207 Wigner's *Unreasonable Effectiveness of Mathematics in the Natural Sciences* led to impor-  
208 tant discussions about the relationship between physics and its main representation [42, 21].  
209 The Mizar Mathematical Library and the Coq library [33] host tens of thousands of math-  
210 ematical propositions to help build and test new proofs. In complex domains with many  
211 variables, Halevy et al. argued for the *Unreasonable Effectiveness of Data* [19], noting that  
212 simple algorithms, when fed large amount of data, would do wonder. High-dimensional  
213 problems like image imputation, where an algorithm has to fill missing parts from an image,  
214 require hundred of thousands of training images to be effective. Goodfellow et al. noted that  
215 roughly 10 000 data-points per possible labels were necessary to train deep neural networks  
216 [17]. These approaches are unsatisfactory for fields like biology where theories and prin-  
217 ciples are seldom exact. We cannot afford the pure logic-based knowledge representations  
218 favoured by mathematicians and physicists, and fitting a model to data is a different task  
219 than building a corpus of interconnected knowledge.

220 Fortunately, we do not need to choose between mathematical theories, probabilistic mod-  
221 els, and learning. New inventions such as Markov logic networks and probabilistic soft logic  
222 are moving Artificial Intelligence toward rich representations capable of formalizing and  
223 even extending scientific theories. This is a great opportunity for synthesis. There are still  
224 problems: inference is often difficult in those rich representations. Recently, Garnelo et al.  
225 [15] designed a prototype to extract logic formulas from a deep learning system, while Hu  
226 et al. [23] created a framework to learn predicate logic rules using deep learning. Both  
227 studies used flexible fuzzy predicates and weighted formulas while exploiting deep learning'  
228 ability to model complex distributions via composition. The end result is a set of clear and  
229 concise weighted formulas supported by deep learning for scalable inference. The potential  
230 for science is important. Not only these new researches allow for deep learning to interact  
231 with traditional theories, but it opens many exciting possibilities, like the creation of large  
232 databases of scientific knowledge. The only thing stopping us from building a unified corpus  
233 of, say, ecological knowledge, is that normal pure-logic systems are too inflexible. They do  
234 not allow imperfect, partially-true theories, which are fundamental to many sciences. Recent  
235 developments in Artificial Intelligence make these corpora of scientific knowledge possible for  
236 complex domains, allowing us to combine a traditional approach to theory with the power  
237 of Artificial Intelligence.

238 It is tempting to present deep learning as a threat to traditional theories. Yet, there is a  
239 real possibility that the union of Artificial Intelligence techniques with mathematical theories  
240 is not only possible, but would help the integration of knowledge across various disciplines.  
241 Otherwise, short of discovering a small set of elegant theories, what is our plan to combine  
242 ideas from ecosystem ecology, community ecology, population ecology, and evolution?

## 243 6 Acknowledgements

244 PDP has been funded by an Alexander Graham Bell Graduate Scholarship from the National  
245 Sciences and Engineering Research Council of Canada, an Azure for Research award from

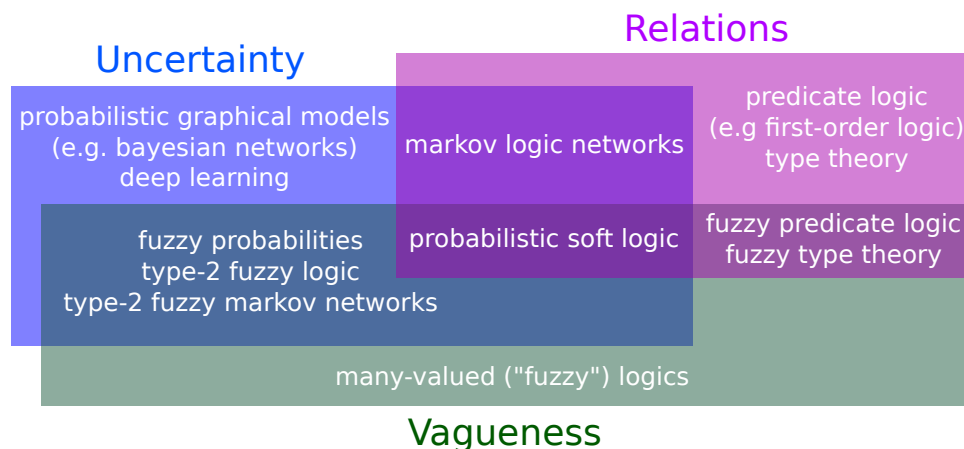

Figure 3: Various reasoning languages and their ability to model uncertainty, vagueness, and relations. The size of the rectangles has no meaning. **In the blue rectangle:** languages capable of handling uncertainty. Probabilistic graphical models combine probability theory with graph theory to represent complex distributions [27]. Deep learning is, strictly speaking, more general than its usual probabilistic interpretation, but it is arguably the most popular probabilistic Artificial Intelligence approach at the moment [17]. Alternatives to probability theory for reasoning about uncertainty include possibility theory and Dempster-Shafer belief functions, see [20] for an extended discussion. **In the green rectangle:** Fuzzy logic extends standard logic by allowing truth values to be anywhere in the  $[0, 1]$  interval. Fuzziness models vagueness and is particularly popular in linguistics, engineering, and bioinformatics, where complex concepts and measures tend to be vague by nature. See [28] for a detailed comparison of probability and fuzziness. **In the purple rectangle:** relations, as in: mathematical relations between objects. Even simple mathematical ideas, such as the notion that all natural numbers have a successor ( $\forall x \exists y : y = x + 1$ ), requires relations. *Predicate* and *Relation* are synonymous in this context. Alone, these reasoning languages are not powerful enough to express scientific ideas. We must thus focus on what lies at their intersection. Type-2 Fuzzy Logic is a fast-expanding [40] extension to fuzzy logic, which, in a nutshell, models uncertainty by considering the truth value itself to be fuzzy [35, 49]. Markov logic networks [39, 13] extends predicate logic with weights to unify probability theory with logic. Probabilistic soft logic [26, 1] also has formulas with weights, but allow the predicates to be fuzzy, i.e. have truth values in the  $[0, 1]$  interval. Some recent deep learning studies also combine all three aspects [15, 23].



246 Microsoft, and benefited from the Hardware Donation Program from NVIDIA. DG is funded  
247 by the Canada Research Chair program and NSERC Discovery grant. TP is funded by an  
248 NSERC Discovery grant and an FQRNT Nouveau Chercheur grant.

## 249 References

- 250 [1] SH Bach, M Broecheler, B Huang, and L Getoor. Hinge-loss markov random fields and  
251 probabilistic soft logic. arXiv: 1505.04406, 2015.
- 252 [2] D Barber. *Bayesian Reasoning and Machine Learning*. Cambridge University Press,  
253 2012.
- 254 [3] L Behounek, P Cintula, and P Hájek. Introduction to mathematical fuzzy logic. In  
255 P Cintula, P Hájek, and C Noguera, editors, *Handbook of Mathematical Fuzzy Logic*  
256 *volume 1*, chapter 1, pages 1–101. College Publications, London, 2011.
- 257 [4] G Bell. Fluctuating selection: the perpetual renewal of adaptation in variable environ-  
258 ments. *Phil. Trans. R. Soc. B*, 365:87–97, 2010.
- 259 [5] Y Bengio, A Courville, and P Vincent. Representation learning: A review and  
260 new perspectives. *IEEE Transactions on Pattern Analysis and Machine Intelligence*,  
261 35(8):1798–1828, 2013.
- 262 [6] M Bergmann. *An introduction to many-valued and fuzzy logic*. Cambridge University  
263 Press, 2008.
- 264 [7] C Brouard, C Vrain, J Dubois, D Castel, MA D, and F d’Alche Buc. Learning a markov  
265 logic network for supervised gene regulatory network inference. *BMC Bioinformatics*,  
266 14(1):273, 2013.
- 267 [8] B Buchanan and EH Shortliffe. *Rule-based Expert Systems: The Mycin experiments of*  
268 *the Stanford Heuristic Programming Project*. Addison-Wesley, 1984.
- 269 [9] G Carleo and M Troyer. Solving the quantum many-body problem with artificial neural  
270 networks. *Science*, 355(6325):602–606, 2017.
- 271 [10] A Coates, B Huval, T Wang, DJ Wu AY Ng, and B Catanzaro. Deep learning with  
272 COTS HPC systems. *Journal of Machine Learning Research Workshop and Conference*  
273 *Proceedings*, 28(3):1337–1345, 2013.
- 274 [11] A Darwiche. *Modeling and Reasoning with Bayesian Networks*. Cambridge University  
275 Press, 2009.
- 276 [12] P Desjardins-Proulx and D Gravel. A complex speciation-richness relationship in a  
277 simple neutral model. *Ecology and Evolution*, 2(8):1781–1790, 2012.
- 278 [13] P Domingos and D Lowd. *Markov Logic: An Interface Layer for Artificial Intelligence*.  
279 Morgan & Claypool Publishers, 2009.
- 280 [14] S Andreassen et al. Evaluation of the diagnostic performance of the expert EMG  
281 assistant MUNIN. *Electroencephalogr Clin Neurophysiol*, 101(2):129–144, 1996.

- 282 [15] M Garnelo, K Arulkumaran, and M Shanahan. Towards deep symbolic reinforcement  
283 learning. arXiv:1609.05518v2, 2016.
- 284 [16] L Getoor, N Friedman, D Koller, A Pfeffer, and B Taskar. Probabilistic relational mod-  
285 els. In L Getoor and B Taskar, editors, *Introduction to Statistical Relational Learning*.  
286 MIT Press, 2007.
- 287 [17] I Goodfellow, Y Bengio, and A Courville. *Deep Learning*. MIT Press, 2016.
- 288 [18] MW Hahn. Toward a selection theory of molecular evolution. *Evolution*, 76(3):255–265,  
289 2008.
- 290 [19] A Halevy, P Norvig, and F Pereira. The unreasonable effectiveness of data. *IEEE*  
291 *Intelligent Systems*, 24:8–12, 2009.
- 292 [20] JY Halpern. *Reasoning about Uncertainty*. The MIT Press, 2003.
- 293 [21] RW Hamming. The unreasonable effectiveness of mathematics. *The American Mathe-*  
294 *matical Monthly*, 87(2):81–90, 1980.
- 295 [22] D Heckerman and B Nathwani. An evaluation of the diagnostic accuracy of Pathfinder.  
296 *Computers and Biomedical Research*, 25(1):56–74, 1992.
- 297 [23] Z Hu, X Ma, Z Liu, E Hovy, and EP Xing. Harnessing deep neural networks with logic  
298 rules. arXiv:1603.06318, 2016.
- 299 [24] P Hájek. *Metamathematics of Fuzzy Logic*. Springer Netherlands, 1998.
- 300 [25] D Jain. Knowledge Engineering with Markov Logic Networks: A Review. In *DKB*  
301 *2011: Proceedings of the Third Workshop on Dynamics of Knowledge and Belief*, 2011.
- 302 [26] A Kimmig, SH Bach, M Broecheler, B Huang, and L Getoor. A short introduction to  
303 probabilistic soft logic. In *Proceedings of the NIPS Workshop on Probabilistic Program-*  
304 *ming*, 2012.
- 305 [27] D Koller and N Friedman. *Probabilistic Graphical Models*. The MIT Press, 2009.
- 306 [28] B Kosko. Fuzziness vs probability. *Int J General Systems*, 17:211–240, 1990.
- 307 [29] M Kot. *Elements of Mathematical Ecology*. Cambridge University Press, 2001.
- 308 [30] Y LeCun, Y Bengio, and G Hinton. Deep learning. *Nature*, (521):436–444, 2015.
- 309 [31] MKK Leung, A Delong, B Alipanahi, and BJ Frey. Machine learning in genomic  
310 medicine: A review of computational problems and data sets. *Proceedings of the IEEE*,  
311 104(1):176–197, 2016.
- 312 [32] RK Lindsay, BG Buchanan, EA Feigenbaum, and J Lederberg. Dendral: A case study  
313 of the first expert system for scientific hypothesis formation. *Artificial Intelligence*,  
314 61(2):209–261, 1993.
- 315 [33] The Coq development team. *The Coq proof assistant reference manual*. LogiCal  
316 Project, 2004. Version 8.0.
- 317 [34] J McCarthy. Programs with common sense. 1959.

- 318 [35] JM Mendel and RI Bob John. Type-2 fuzzy sets made simple. *IEEE Transactions on*  
319 *Fuzzy Systems*, 10(2):117–127, 2002.
- 320 [36] L Mihalkova, T Huynh, and RJ Mooney. Mapping and revising markov logic networks  
321 for transfer learning. In *Proceedings of the 22nd Conference on Artificial Intelligence*,  
322 pages 608–614, 2007.
- 323 [37] S Muggleton and L de Raedt. Inductive logic programming: Theory and methods. *The*  
324 *Journal of Logic Programming*, 19-20:629–679, 1994.
- 325 [38] SH Rice. *Evolutionary Theory: Mathematical and Conceptual Foundations*. Sinauer,  
326 2004.
- 327 [39] M Richardson and P Domingos. Markov logic networks. *Machine Learning*, 62(1-  
328 2):107–136, 2006.
- 329 [40] A Sadeghian, JM Mendel, and H Tahayori. *Advances in Type-2 Fuzzy Sets and Systems*.  
330 Springer, 2014.
- 331 [41] D Silver, A Huang, CJ Maddison, A Guez, L Sifre, G van den Driessche, J Schrit-  
332 twieser, I Antonoglou, V Panneershelvam, M Lanctot, S Dieleman, D Grewe, J Nham,  
333 N Kalchbrenner, I Sutskever, T Lillicrap, M Leach, K Kavukcuoglu, T Graepel, and  
334 D Hassabis. Mastering the game of Go with deep neural networks and tree search.  
335 *Nature*, 529:484–489, 2016.
- 336 [42] E Wigner. The unreasonable effectiveness of mathematics in the natural sciences.  
337 *Communications in Pure and Applied Mathematics*, 13(1):1–14, 1960.
- 338 [43] RJ Williams, A Anandanadesan, and ND Martinez. The probabilistic niche model  
339 reveals the niche structure and role of body size in a complex food web. *PLOS One*,  
340 5(8):e12092, 2010.
- 341 [44] RJ Williams and ND Martinez. Simple rules yield complex food webs. *Nature*, 404:180–  
342 183, 2000.
- 343 [45] K Yoshikawa, S Riedel, M Asahara, and Y Matsumoto. Jointly identifying temporal  
344 relations with markov logic. 2009.
- 345 [46] C Yuan and B Malone. Learning optimal bayesian networks: A shortest path perspec-  
346 tive. *Journal of Artificial Intelligence Research*, 48:23–65, 2013.
- 347 [47] LA Zadeh. Fuzzy sets. *Information and Control*, 8(3):338–353, 1965.
- 348 [48] T Zahavy, N Ben-Zrihem, and S Mannor. Graying the black box: Understanding  
349 DQNS. arXiv: 1602.02658, 2016.
- 350 [49] J Zeng and Z-Q Liu. Type-2 fuzzy markov random fields and their application to hand-  
351 written chinese character recognition. *IEEE Transactions on Fuzzy Systems*, 16(3):747–  
352 760, 2008.
